# Supplementary material for: Quantitative Determination of 5-Aminoisoquinoline, a PARP-1 Inhibitor by UPLC-MS/MS: In Silico ADME Profile and In Vitro Metabolic Stability Study
Source: MDPI journal article supplement (doi:10.3390/app12125998), 2022-06-13
Supplement: s1 [file s1]

**Table S1: Stability data of 5-AIQ in human plasma (n = 5).**

| Stability                  | Nominal concentration (ng/mL) (n=6) | Precision (RSD, %) | Bias (RE, %) |
|----------------------------|-------------------------------------|--------------------|--------------|
| Short-term (8 h )          | 50                                  | 1.7                | -2.6         |
|                            | 500                                 | 3.3                | 7.4          |
| Freeze thaw (3 cycle)      | 50                                  | 3.8                | -4.1         |
|                            | 500                                 | 4.2                | -13.5        |
| Autosampler (24 h at 15°C) | 50                                  | 10.5               | 5.7          |
|                            | 500                                 | 7.2                | 7.6          |
| 2 month at -70°C           | 50                                  | 7.9                | -10.1        |
|                            | 500                                 | 3.6                | -8.3         |

**Table S2: ADME properties of 5-AIQ screened by SwissADME software.**

| Physicochemical Properties               |                                              |
|------------------------------------------|----------------------------------------------|
| Formula                                  | C <sub>9</sub> H <sub>8</sub> N <sub>2</sub> |
| Molecular weight                         | 144.17 g/mol                                 |
| Num. heavy atoms                         | 11                                           |
| Num. arom. heavy atoms                   | 10                                           |
| Fraction Csp <sup>3</sup>                | 0.00                                         |
| Num. rotatable bonds                     | 0                                            |
| Num. H-bond acceptors                    | 1                                            |
| Num. H-bond donors                       | 1                                            |
| Molar Refractivity                       | 46.15                                        |
| TPSA                                     | 38.91 Å <sup>2</sup>                         |
| Lipophilicity                            |                                              |
| Log <i>P</i> <sub>o/w</sub> (iLOGP)      | 1.27                                         |
| Log <i>P</i> <sub>o/w</sub> (XLOGP3)     | 1.42                                         |
| Log <i>P</i> <sub>o/w</sub> (WLOGP)      | 1.82                                         |
| Log <i>P</i> <sub>o/w</sub> (MLOGP)      | 0.92                                         |
| Log <i>P</i> <sub>o/w</sub> (SILICOS-IT) | 1.77                                         |
| Consensus Log <i>P</i> <sub>o/w</sub>    | 1.44                                         |
| Water Solubility                         |                                              |
| Log <i>S</i> (ESOL)                      | -2.30                                        |
| Solubility                               | 7.21e-01 mg/ml ; 5.00e-03 mol/l              |
| Class                                    | Soluble                                      |
| Log <i>S</i> (Ali)                       | -1.84                                        |
| Solubility                               | 2.08e+00 mg/ml ; 1.44e-02 mol/l              |
| Class                                    | Very soluble                                 |
| Log <i>S</i> (SILICOS-IT)                | -3.32                                        |
| Solubility                               | 6.93e-02 mg/ml ; 4.81e-04 mol/l              |
| Class                                    | Soluble                                      |
| Pharmacokinetics                         |                                              |
| GI absorption                            | High                                         |

|                             |                                     |
|-----------------------------|-------------------------------------|
| BBB permeant                | Yes                                 |
| P-gp substrate              | No                                  |
| CYP1A2 inhibitor            | Yes                                 |
| CYP2C19 inhibitor           | No                                  |
| CYP2C9 inhibitor            | No                                  |
| CYP2D6 inhibitor            | No                                  |
| CYP3A4 inhibitor            | No                                  |
| Log $K_p$ (skin permeation) | -6.17 cm/s                          |
| <b>Druglikeness</b>         |                                     |
| Lipinski                    | Yes; 0 violation                    |
| Ghose                       | No; 2 violations: MW<160, #atoms<20 |
| Veber                       | Yes                                 |
| Egan                        | Yes                                 |
| Muegge                      | No; 1 violation: MW<200             |
| Bioavailability Score       | 0.55                                |
| <b>Medicinal Chemistry</b>  |                                     |
| PAINS                       | 0 alert                             |
| Brenk                       | 1 alert: aniline                    |
| Leadlikeness                | No; 1 violation: MW<250             |
| Synthetic accessibility     | 1.00                                |
